# Supplementary material for: Vaccine Hesitancy and Trust in the Scientific Community in Italy: Comparative Analysis from Two Recent Surveys
Source: MDPI journal article supplement (doi:10.3390/vaccines9101206), 2021-10-19
Supplement: s1 [file s1]

**Table S1**

Descriptive characteristics of 2,626 respondents according to their opinion on harmfulness of vaccines (% in brackets). ESS Round 8.

|                                  | Vaccines are harmful |              |              |               |              | Missing |
|----------------------------------|----------------------|--------------|--------------|---------------|--------------|---------|
|                                  |                      | Agree        | Undecided    | Disagree      | No answer    | (n=0)   |
|                                  | n = 2,626            | n = 505 (19) | n = 535 (20) | n = 1302 (50) | n = 284 (11) |         |
| Gender                           |                      |              |              |               |              | 0       |
| Male                             | 1284                 | 249 (49)     | 264 (49)     | 619 (48)      | 152 (53)     |         |
| Female                           | 1342                 | 256 (51)     | 272 (51)     | 683 (52)      | 132 (47)     |         |
| Age classes                      |                      |              |              |               |              | 13      |
| Less than 25                     | 341                  | 57 (11)      | 66 (12)      | 170 (13)      | 48 (17)      |         |
| 25-44                            | 752                  | 153 (30)     | 167 (31)     | 372 (29)      | 61 (22)      |         |
| 45-65                            | 909                  | 179 (36)     | 188 (36)     | 464 (36)      | 77 (27)      |         |
| 65+                              | 610                  | 113 (23)     | 110 (21)     | 291 (22)      | 96 (34)      |         |
| Education (in years)             |                      |              |              |               |              | 27      |
| 5                                | 783                  | 168 (34)     | 152 (29)     | 341 (26)      | 122 (44)     |         |
| 8                                | 1135                 | 215 (43)     | 238 (45)     | 576 (45)      | 105 (38)     |         |
| 13                               | 348                  | 67 (13)      | 77 (14)      | 178 (14)      | 25 (9)       |         |
| 14+                              | 334                  | 49 (10)      | 62 (12)      | 200 (15)      | 23 (9)       |         |
| Religion                         |                      |              |              |               |              | 49      |
| No                               | 659                  | 126 (25)     | 136 (26)     | 346 (27)      | 51 (19)      |         |
| Yes                              | 1918                 | 371 (75)     | 386 (74)     | 943 (73)      | 219 (81)     |         |
| Type of residence                |                      |              |              |               |              | 3       |
| Farm or home in countryside      | 97                   | 16 (3)       | 19 (4)       | 44 (3)        | 17 (6)       |         |
| Country village                  | 1149                 | 201 (40)     | 275 (51)     | 551 (42)      | 121 (43)     |         |
| Town or small city               | 931                  | 187 (37)     | 162 (30)     | 495 (38)      | 87 (30)      |         |
| Suburbs/ outskirts of a big city | 156                  | 34 (7)       | 31 (6)       | 75 (6)        | 16 (6)       |         |
| Big city                         | 291                  | 67 (13)      | 46 (9)       | 136 (11)      | 42 (15)      |         |
| Trust in scientific community    |                      |              |              |               |              | 0       |
| Agree strongly                   | 446                  | 35 (7)       | 28 (5)       | 375 (29)      | 7 (3)        |         |

|                            |      |          |          |          |          |
|----------------------------|------|----------|----------|----------|----------|
| Agree                      | 1111 | 178 (35) | 187 (35) | 689 (53) | 57 (20)  |
| Neither agree nor disagree | 584  | 139 (28) | 269 (50) | 146 (11) | 30 (11)  |
| Disagree                   | 171  | 85 (17)  | 33 (6)   | 44 (3)   | 9 (3)    |
| Disagree strongly          | 84   | 59 (12)  | 1 (0)    | 24 (2)   | 0 (0)    |
| Refusal                    | 24   | 1 (0)    | 0 (0)    | 0 (0)    | 23 (8)   |
| Don't know                 | 207  | 8 (2)    | 18 (3)   | 24 (2)   | 157 (55) |

Politics

26

|                       |     |          |          |          |          |
|-----------------------|-----|----------|----------|----------|----------|
| Not at all interested | 904 | 200 (40) | 170 (32) | 397 (31) | 137 (50) |
| Hardly interested     | 982 | 152 (31) | 227 (43) | 508 (39) | 95 (34)  |
| Quite interested      | 600 | 127 (26) | 120 (22) | 314 (24) | 39 (14)  |
| Very interested       | 115 | 17 (3)   | 16 (3)   | 77 (6)   | 5 (2)    |

Political orientation

920

|        |     |          |          |          |         |
|--------|-----|----------|----------|----------|---------|
| Right  | 489 | 111 (38) | 102 (29) | 243 (26) | 32 (26) |
| Centre | 788 | 111 (37) | 192 (54) | 430 (46) | 56 (45) |
| Left   | 429 | 73 (25)  | 60 (17)  | 261 (28) | 35 (29) |

State of health service in  
your country nowadays

31

|                     |     |         |          |          |         |
|---------------------|-----|---------|----------|----------|---------|
| 0 (Very bad)        | 145 | 61 (12) | 21 (4)   | 46 (4)   | 18 (6)  |
| 1                   | 79  | 32 (6)  | 15 (3)   | 29 (2)   | 4 (1)   |
| 2                   | 142 | 35 (7)  | 37 (7)   | 52 (4)   | 17 (6)  |
| 3                   | 212 | 48 (9)  | 40 (7)   | 94 (7)   | 30 (11) |
| 4                   | 234 | 44 (9)  | 57 (11)  | 112 (9)  | 21 (8)  |
| 5                   | 353 | 54 (11) | 82 (15)  | 183 (14) | 34 (12) |
| 6                   | 468 | 74 (15) | 94 (18)  | 249 (19) | 51 (19) |
| 7                   | 491 | 73 (15) | 101 (19) | 265 (21) | 51 (19) |
| 8                   | 340 | 50 (10) | 63 (12)  | 193 (15) | 33 (12) |
| 9                   | 84  | 20 (4)  | 14 (3)   | 41 (3)   | 9 (3)   |
| 10 (Extremely good) | 46  | 10 (2)  | 6 (1)    | 25 (2)   | 5 (2)   |

Health status

11

|          |     |        |        |        |        |
|----------|-----|--------|--------|--------|--------|
| Very bad | 31  | 6 (1)  | 2 (0)  | 16 (1) | 7 (3)  |
| Bad      | 121 | 24 (5) | 21 (4) | 56 (5) | 20 (7) |

|           |      |          |          |          |          |
|-----------|------|----------|----------|----------|----------|
| Fair      | 648  | 140 (28) | 131 (25) | 297 (23) | 80 (29)  |
| Good      | 1192 | 229 (45) | 257 (48) | 602 (46) | 104 (37) |
| Very good | 623  | 104 (21) | 122 (23) | 329 (25) | 69 (24)  |

Participation at congress, courses, training

23

|     |      |          |          |           |          |
|-----|------|----------|----------|-----------|----------|
| No  | 327  | 44 (9)   | 481 (8)  | 218 (17)  | 22 (8)   |
| Yes | 2276 | 458 (91) | 481 (92) | 1079 (83) | 258 (92) |

How often do you use Internet

0

|                    |      |          |          |          |          |
|--------------------|------|----------|----------|----------|----------|
| Never              | 592  | 123 (24) | 106 (20) | 253 (19) | 109 (39) |
| Only occasionally  | 184  | 44 (9)   | 51 (9)   | 74 (6)   | 15 (5)   |
| A few times a week | 179  | 33 (7)   | 42 (8)   | 85 (7)   | 20 (7)   |
| Most days          | 388  | 77 (15)  | 89 (17)  | 184 (14) | 37 (13)  |
| Every day          | 1267 | 222 (44) | 240 (45) | 704 (54) | 100 (35) |
| Don't know         | 16   | 6 (1)    | 7 (1)    | 1 (0)    | 2 (1)    |

Most people can be trusted or you can't be too careful

0

|                                 |     |         |          |          |         |
|---------------------------------|-----|---------|----------|----------|---------|
| 0 (You can't be too careful)    | 224 | 56 (11) | 22 (4)   | 101 (8)  | 45 (16) |
| 1                               | 117 | 29 (6)  | 17 (3)   | 62 (5)   | 9 (3)   |
| 2                               | 207 | 36 (7)  | 44 (8)   | 104 (8)  | 23 (8)  |
| 3                               | 249 | 57 (11) | 53 (10)  | 111 (9)  | 28 (10) |
| 4                               | 301 | 61 (12) | 72 (13)  | 137 (10) | 32 (11) |
| 5                               | 553 | 81 (16) | 134 (25) | 280 (21) | 58 (20) |
| 6                               | 405 | 83 (16) | 89 (17)  | 190 (15) | 43 (15) |
| 7                               | 320 | 52 (10) | 54 (10)  | 186 (14) | 27 (10) |
| 8                               | 189 | 32 (6)  | 37 (7)   | 105 (8)  | 15 (5)  |
| 9                               | 28  | 7 (2)   | 6 (1)    | 12 (1)   | 2 (1)   |
| 10 (Most people can be trusted) | 27  | 9 (2)   | 5 (1)    | 12 (1)   | 1 (1)   |
| Refusal                         | 1   | 0 (0)   | 1 (0)    | 0 (0)    | 0 (0)   |
| Don't know                      | 6   | 2 (1)   | 2 (1)    | 1 (0)    | 1 (0)   |

**Table S2.**

Descriptive characteristics of 2,745 respondents according to their opinion on harmfulness of vaccines (% in brackets). ESS - Round 9.

| Vaccines are harmful             |           |              |              |               |             |
|----------------------------------|-----------|--------------|--------------|---------------|-------------|
|                                  | Agree     | Undecided    | Disagree     | No answer     | Missing     |
|                                  | n = 2,745 | n = 381 (14) | n = 412 (15) | n = 1740 (63) | n = 212 (8) |
| Gender                           |           |              |              |               | 0           |
| Male                             | 1297      | 186 (49)     | 205 (49)     | 804 (46)      | 102 (49)    |
| Female                           | 1448      | 196 (51)     | 210 (51)     | 935 (54)      | 106 (51)    |
| Age classes                      |           |              |              |               | 21          |
| Less than 25                     | 316       | 38 (10)      | 54 (13)      | 189 (11)      | 35 (17)     |
| 25-44                            | 703       | 94 (25)      | 122 (30)     | 440 (25)      | 47 (23)     |
| 45-65                            | 918       | 147 (39)     | 142 (35)     | 585 (34)      | 44 (21)     |
| 65+                              | 787       | 99 (26)      | 91 (22)      | 517 (30)      | 80 (39)     |
| Education (in years)             |           |              |              |               | 85          |
| 0-7                              | 363       | 42 (11)      | 49 (12)      | 215 (12)      | 57 (28)     |
| 8-12                             | 1009      | 171 (45)     | 159 (39)     | 596 (34)      | 84 (41)     |
| 13                               | 609       | 79 (21)      | 101 (25)     | 407 (24)      | 22 (11)     |
| 14+                              | 680       | 68 (18)      | 89 (22)      | 494 (29)      | 29 (14)     |
| Religion                         |           |              |              |               | 41          |
| No                               | 566       | 80 (21)      | 103 (25)     | 347 (20)      | 36 (18)     |
| Yes                              | 2138      | 294 (79)     | 304 (75)     | 1379 (80)     | 161 (82)    |
| Type of residence                |           |              |              |               | 9           |
| Farm or home in countryside      | 95        | 12 (3)       | 14 (3)       | 60 (3)        | 10 (5)      |
| Country village                  | 1179      | 182 (48)     | 183 (44)     | 715 (41)      | 98 (48)     |
| Town or small city               | 956       | 113 (30)     | 135 (32)     | 648 (37)      | 60 (29)     |
| Suburbs/ outskirts of a big city | 168       | 20 (5)       | 33 (8)       | 99 (6)        | 15 (7)      |
| Big city                         | 338       | 50 (13)      | 50 (12)      | 216 (12)      | 22 (11)     |
| Trust in scientific community    |           |              |              |               |             |
| Agree strongly                   | 737       | 57 (15)      | 27 (7)       | 647 (37)      | 6 (3)       |
| Agree                            | 1174      | 116 (30)     | 121 (29)     | 895 (51)      | 43 (20)     |

|                            |     |         |          |         |          |
|----------------------------|-----|---------|----------|---------|----------|
| Neither agree nor disagree | 453 | 74 (19) | 241 (58) | 122 (7) | 16 (8)   |
| Disagree                   | 158 | 93 (24) | 18 (4)   | 40 (2)  | 6 (3)    |
| Disagree strongly          | 71  | 39 (10) | 3 (1)    | 24 (1)  | 5 (2)    |
| Refusal                    | 16  | 1 (0)   | 1 (0)    | 0 (0)   | 14 (7)   |
| Don't know                 | 137 | 3 (1)   | 3 (1)    | 12 (1)  | 119 (57) |

#### Politics

8

|                       |      |          |          |          |          |
|-----------------------|------|----------|----------|----------|----------|
| Not at all interested | 863  | 137 (36) | 147 (36) | 469 (27) | 109 (53) |
| Hardly interested     | 1046 | 145 (38) | 162 (39) | 667 (39) | 73 (35)  |
| Quite interested      | 679  | 82 (22)  | 88 (21)  | 487 (28) | 23 (11)  |
| Very interested       | 149  | 14 (4)   | 18 (4)   | 114 (7)  | 3 (1)    |

#### Political orientation

744

|        |     |          |          |          |         |
|--------|-----|----------|----------|----------|---------|
| Right  | 620 | 97 (34)  | 84 (28)  | 411 (31) | 28 (29) |
| Centre | 935 | 136 (48) | 160 (54) | 588 (44) | 51 (52) |
| Left   | 446 | 49 (17)  | 51 (17)  | 327 (25) | 19 (19) |

#### State of health service in your country nowadays

32

|                     |     |         |         |          |         |
|---------------------|-----|---------|---------|----------|---------|
| 0 (Very bad)        | 97  | 20 (5)  | 10 (2)  | 55 (3)   | 12 (6)  |
| 1                   | 61  | 10 (3)  | 7 (2)   | 38 (2)   | 6 (3)   |
| 2                   | 120 | 24 (7)  | 21 (5)  | 67 (4)   | 7 (4)   |
| 3                   | 185 | 29 (8)  | 26 (6)  | 118 (7)  | 12 (6)  |
| 4                   | 220 | 36 (10) | 43 (11) | 125 (7)  | 15 (8)  |
| 5                   | 358 | 58 (15) | 55 (13) | 215 (12) | 30 (15) |
| 6                   | 453 | 57 (15) | 75 (18) | 293 (17) | 28 (14) |
| 7                   | 579 | 59 (16) | 98 (24) | 386 (22) | 36 (18) |
| 8                   | 453 | 52 (14) | 55 (13) | 316 (18) | 31 (16) |
| 9                   | 130 | 24 (6)  | 13 (3)  | 84 (5)   | 9 (5)   |
| 10 (Extremely good) | 56  | 5 (1)   | 8 (2)   | 32 (2)   | 10 (5)  |

#### Health status

9

|          |     |        |        |        |         |
|----------|-----|--------|--------|--------|---------|
| Very bad | 35  | 4 (1)  | 6 (1)  | 18 (1) | 7 (3)   |
| Bad      | 134 | 23 (6) | 17 (4) | 70 (4) | 24 (12) |

|           |      |          |          |          |         |
|-----------|------|----------|----------|----------|---------|
| Fair      | 716  | 124 (33) | 94 (23)  | 442 (25) | 56 (27) |
| Good      | 1241 | 152 (40) | 199 (48) | 815 (47) | 76 (37) |
| Very good | 610  | 79 (21)  | 99 (24)  | 392 (23) | 41 (20) |

#### Participation at congress, courses, training

21

|     |      |          |          |           |          |
|-----|------|----------|----------|-----------|----------|
| No  | 2409 | 350 (94) | 375 (91) | 1493 (86) | 192 (95) |
| Yes | 315  | 21 (6)   | 38 (9)   | 244 (14)  | 11 (5)   |

#### How often do you use Internet

5

|                    |      |          |          |          |         |
|--------------------|------|----------|----------|----------|---------|
| Never              | 597  | 88 (23)  | 85 (20)  | 348 (20) | 77 (37) |
| Only occasionally  | 211  | 44 (12)  | 34 (8)   | 120 (7)  | 13 (6)  |
| A few times a week | 190  | 23 (6)   | 33 (8)   | 122 (7)  | 12 (6)  |
| Most days          | 361  | 63 (17)  | 55 (13)  | 217 (12) | 25 (12) |
| Every day          | 1381 | 161 (43) | 208 (50) | 931 (54) | 82 (40) |

Don't know

#### Most people can be trusted or you can't be too careful

9

|                                 |     |         |         |          |         |
|---------------------------------|-----|---------|---------|----------|---------|
| 0 (You can't be too careful)    | 187 | 27 (7)  | 38 (9)  | 98 (6)   | 23 (12) |
| 1                               | 105 | 17 (5)  | 13 (3)  | 62 (4)   | 13 (7)  |
| 2                               | 225 | 30 (8)  | 37 (9)  | 131 (8)  | 27 (14) |
| 3                               | 296 | 39 (10) | 54 (13) | 182 (11) | 21 (11) |
| 4                               | 279 | 31 (8)  | 29 (7)  | 202 (12) | 17 (9)  |
| 5                               | 498 | 84 (22) | 76 (18) | 304 (18) | 34 (18) |
| 6                               | 408 | 49 (13) | 69 (17) | 264 (15) | 26 (13) |
| 7                               | 432 | 60 (16) | 51 (12) | 293 (17) | 27 (14) |
| 8                               | 231 | 32 (9)  | 36 (9)  | 150 (9)  | 12 (6)  |
| 9                               | 37  | 6 (2)   | 4 (1)   | 23 (1)   | 4 (2)   |
| 10 (Most people can be trusted) | 40  | 4 (1)   | 6 (1)   | 28 (2)   | 1 (1)   |
| Refusal                         | 1   | 0 (0)   | 1 (0)   | 0 (0)    | 0 (0)   |
| Don't know                      | 8   | 2 (1)   | 3 (1)   | 0 (0)    | 3 (2)   |
